# Supplementary material for: A multiscale modelling approach to elucidate the mechanism of the oxygen evolution reaction at the hematite–water interface
Source: Royal Society of Chemistry journal article supplement (doi:10.1039/c9fd00140a), 2019-12-23
Supplement: c9fd00140a2.pdf [file c9fd00140a2.pdf]

## Supporting Information

### A Multiscale Modelling Approach to Elucidate the Mechanism of the Oxygen Evolution Reaction at the Hematite-Water Interface

V. Sinha<sup>\*1,2</sup>, D. Sun<sup>3</sup>, E. J. Meijer<sup>3</sup>, T. J. H. Vlugt<sup>\*2</sup>, A. Bieberle-Hütter<sup>\*1</sup>

<sup>1</sup> Electrochemical Materials and Interfaces, Dutch Institute for Fundamental Energy Research (DIFFER), de Zaale 20, 5612 AJ, Eindhoven, The Netherlands

<sup>2</sup> Process and Energy Department, Faculty of Mechanical, Maritime and Materials Engineering, Delft University of Technology, Leeghwaterstraat 39, 2628CB, Delft, The Netherlands

<sup>3</sup> Amsterdam Center for Multiscale Modelling, HIMS, University of Amsterdam, Amsterdam, The Netherlands.

\* corresponding authors: [V.Sinha@diffier.nl](mailto:V.Sinha@diffier.nl), [T.J.H.Vlugt@tudelft.nl](mailto:T.J.H.Vlugt@tudelft.nl), [A.Bieberle@diffier.nl](mailto:A.Bieberle@diffier.nl)

### Force profile from constrained DFT-MD

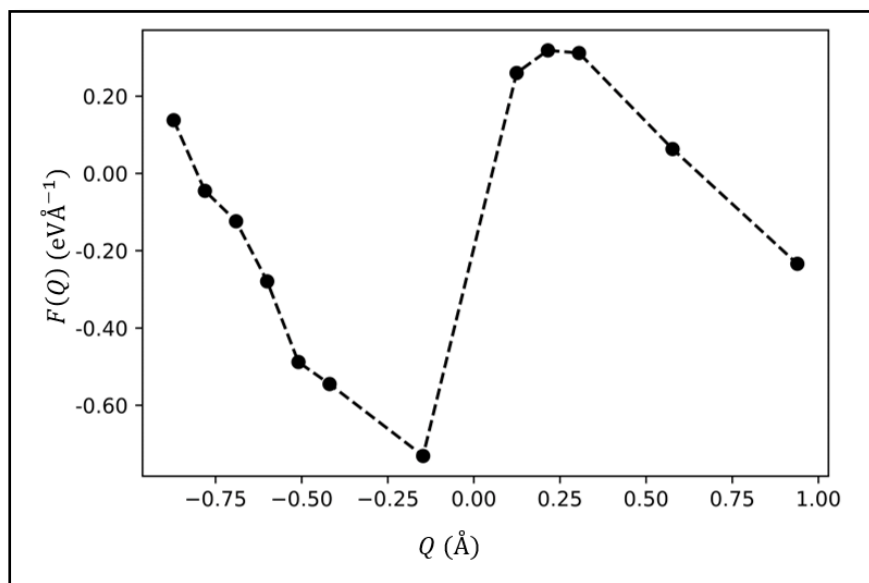

Figure-SI- 1. Force profile obtained from DFT-MD simulations. Each point was run for 3-5 ps and the resulting profile was integrated to construct the Gibbs free energy profile reported in the main text (Figure 5).

### Force and Gibbs free energy profiles from steered MD using slow growth approach

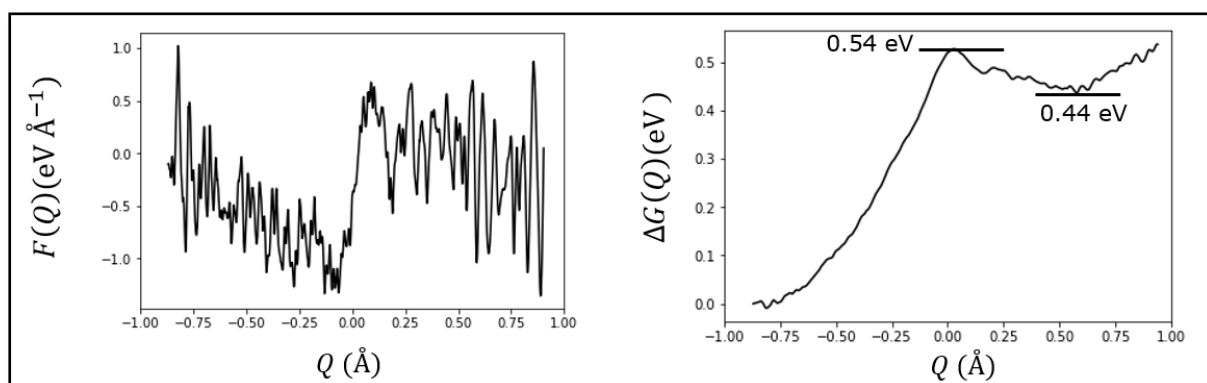

Figure-SI- 2. (left) force profile from slow growth approach simulations to simulate the proton transfer reaction. (right) Gibbs free energy profile for the proton transfer reaction obtained by integrating the force profile.

### Comparison of OH coverage for mechanisms M1 and M2

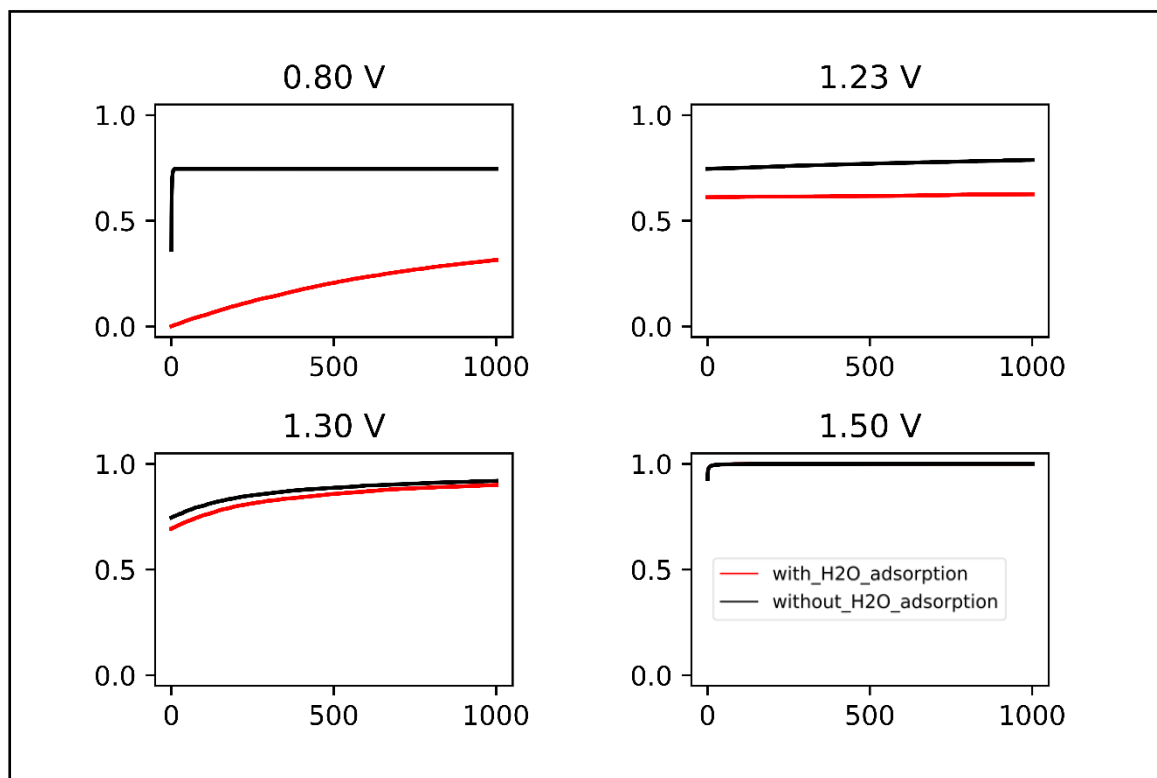

Figure-SI- 3. Comparison of surface coverage of OH (y-axis) as a function of time (x-axis) for various values of the applied bias for mechanisms M1 (red, with H<sub>2</sub>O adsorption) and M2 (black, without H<sub>2</sub>O adsorption).

### Comparison of O<sub>2</sub> evolution for mechanisms M1 and M2

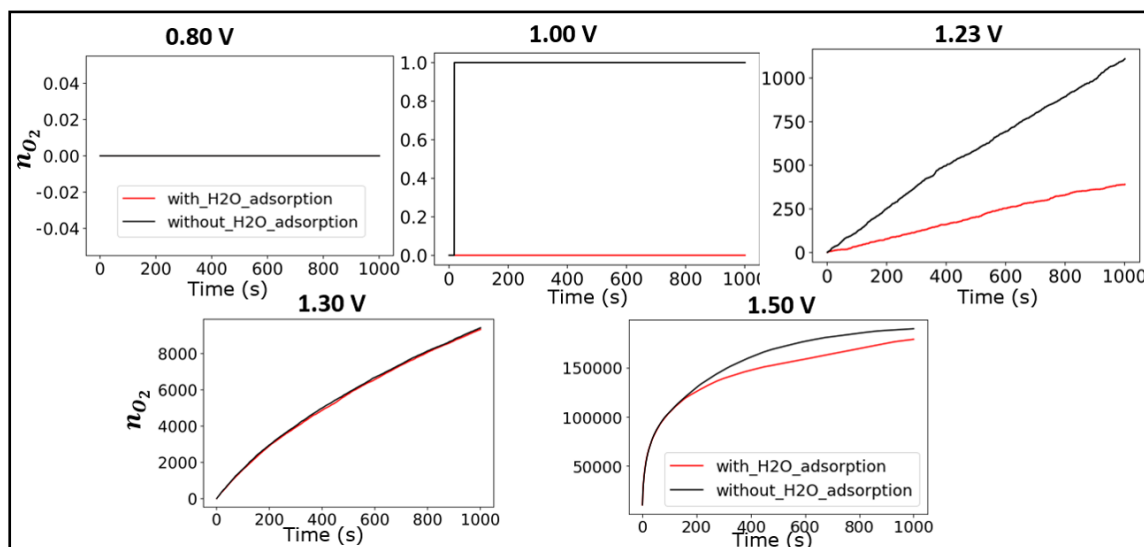

Figure-SI- 4. Comparison of O<sub>2</sub> evolution as a function of time for various values of the applied bias for mechanisms M1 (red, with H<sub>2</sub>O adsorption) and M2 (black, without H<sub>2</sub>O adsorption).

### Rate constants for kMC

Rate of individual steps in kMC were determined by eq(13) as described in the main text

$$k_f^i = A_f * \exp\left(-\frac{G_f^i}{k_B T}\right) \quad (13a)$$

$$k_b^i = A_b * \exp\left(-\frac{G_b^i}{k_B T}\right) \quad (13b)$$

The adsorption of water was modelled as follows:

Forward reaction, adsorption:  $A_f = 10^5 \text{ s}^{-1}$  and  $G_f = 0.00 \text{ eV}$

Backward reaction, desorption:  $A_b = 1$  and  $G_b = 0.2 \text{ eV}$

For modelling the adsorption/desorption of water the parameters  $\{A_f, A_b, G_f, G_b\}$  were chosen to ensure that most of the wall-time is kMC simulations is not used in simulating fast reversible process of adsorption of water. For rest of the steps which are all electrochemical in nature we used the same pre-factors ( $A_f = A_b = 10^{14} \text{ s}^{-1}$ ) for the forward and the backward reaction.

*Table-SI- 1. TS barriers for forward and backward reactions in mechanism M1 for selected values of V. Potential dependent rate constants can be evaluated from this data using eq(13)*

| V    | $TS_{\{H_2O \rightarrow OH\}}$ | $TS_{\{OH \rightarrow H_2O\}}$ | $TS_{\{OH \rightarrow O\}}$ | $TS_{\{O \rightarrow OH\}}$ | $TS_{\{O \rightarrow OOH\}}$ | $TS_{\{OOH \rightarrow O\}}$ | $TS_{\{O_2 \rightarrow OOH\}}$ | $TS_{\{OOH \rightarrow O_2\}}$ |
|------|--------------------------------|--------------------------------|-----------------------------|-----------------------------|------------------------------|------------------------------|--------------------------------|--------------------------------|
| 0.0  | 1.82                           | 0.11                           | 2.29                        | 0.11                        | 1.30                         | 0.11                         | 0.11                           | 0.11                           |
| 0.8  | 1.02                           | 0.11                           | 1.49                        | 0.11                        | 0.5                          | 0.11                         | 0.00                           | 0.11                           |
| 1.0  | 0.82                           | 0.11                           | 1.29                        | 0.11                        | 0.30                         | 0.11                         | 0.00                           | 0.11                           |
| 1.23 | 0.59                           | 0.11                           | 1.06                        | 0.11                        | 0.07                         | 0.11                         | 0.00                           | 0.11                           |
| 1.30 | 0.52                           | 0.11                           | 0.99                        | 0.11                        | 0.00                         | 0.11                         | 0.00                           | 0.11                           |
| 1.50 | 0.32                           | 0.11                           | 0.79                        | 0.11                        | 0.00                         | 0.11                         | 0.00                           | 0.11                           |

## Representative INCAR files

### Geometry Optimizations

SYSTEM = Fe2O3 ionic relaxation

ICHARG = 1 initial charge density option

ISTART = 1 initial wavefunctions option

PREC = Medium precision of calculation

NELM = 60 max number of electronic steps

NELMIN = 2 min number of electronic steps

EDIFF = 1E-04 energy stopping criterion for electronic iterations

EDIFFG = -1E-02 force stopping criterion for geometric

LREAL = A real-space projection

ALGO=Very Fast choose algorithm

NSIM=4 parallelization option

ISPIN=2 spin-polarization option

ISYM = 0 turns symmetry calculation on or off

ISIF = 2 geometrical relaxation mode

NSW = 300 max number of geometry steps

IBRION = 2 ionic relaxation method

POTIM = .07 time step for geometrical optimization

ISMEAR = 0 smearing method

SIGMA = .100 broadening in eV

```

ENCUT = 700
MAGMOM = 72*0 24*-4 24*4  #corresponding to 72 O and 48 Fe
RWIGS = 0.8 1.2
LDAU = .TRUE.
LDAUTYPE = 2
LDAUL = -1 2
LDAUU = 0.0 4.30
LDAUJ = 0.00 0.00
LDAUPRINT = 2
LWAVE = F
LSOL = T

```

#### DFT-MD simulations

```

SYSTEM = Fe2O3
# Start parameter for this run:
! NWRITE = 2
PREC = low
ISTART = 1
ICHARG = 1
ISPIN = 2
! NBANDS = 120
MAGMOM = 32*-4.0 32*4.0 96*0.0 208*0.0
! LNONCOLLINEAR = F
! LSORBIT = F
! INIWAV = 1
! LASPH = F
! METAGGA = F
# Electronic Relaxation 1
ENCUT = 500.0 eV
ENAU = 600.0 eV
EDIFF = 1E-06
LREAL = Auto
! VOSKOWN = 1
! NELM = 40
NELM = 40; NELMIN = 8
! ENINI = 200.0
! LCOMPAT = F
! LREAL_COMPAT = F
! GGA_COMPAT = T
! LMAXPAW = -100
! LMAXMIX = 2
! ROPT = 0.00000
# Electronic relaxation 2 (details)
ALGO = Very Fast
! IALGO = 38
! LDIAG = T
! IMIX = 4
! AMIX = 0.80; BMIX = 1.00
! AMIX_MAG = 3.20; BMIX_MAG = 1.00
! AMIN = 0.10
! WC = 100.; INIMIX = 1; MIXPRE = 1
# Ionic relaxation

```

```

! EDIFFG =
! ISIF =
  NSW = 1000
  IBRION = 0
! NBLOCK = 1; KBLOCK = 1
! NFREE = 0
! IWAVPR = 10
  ISYM = 0
! LCORR = T
  POTIM = 0.50
! TEIN = 350
  TEBEG = 350.0; TEEND = 350.0
  SMASS = 0
! NPACO = 256; APACO = 16.0
! PSTRESS = 0.0
! MDALGO = 11

# DOS related values:
  ISMEAR = 0; SIGMA = 0.05
! EMIN = 10.00; EMAX = -10.00
# Write flags
  LWAVE = F
  LCHARG = F
  LVTOT = F
! LELF =
! LORBIT =
# Atomic Wigner-Seitz radii
! RWIGS = -1.00
! NELECT = 1.0000
! NUPDOWN = -1.0000
# Mass of Ions in am
#Fe Fe O O O H
  POMASS = 55.8 55.8 16.0 16.0 16.0 2.0 # Deuterium mass for H
# BLYP
  GGA = B5
  ALDAX = 1.00
  AGGAX = 1.00
  AGGAC = 1.00
  ALDAC = 0.00
# vdW correction
  IVDW = 12
  LVDWSCS = .TRUE.
# meta dynamics
  MDALGO = 2
! HILLS_H = 0.1E-2
! HILLS_W =
! HILLS_BIN = 50
  LBLUEOUT = .TRUE.
! INCREM = 0.0005
NPAR = 16

```

The CONTCAR files from geometry optimizations with and without VASPsol, and the force profiles from constrained DFT-MD simulations are provided separately as a .zip file.

## Molecular models of hematite in DFT and DFT-MD simulations

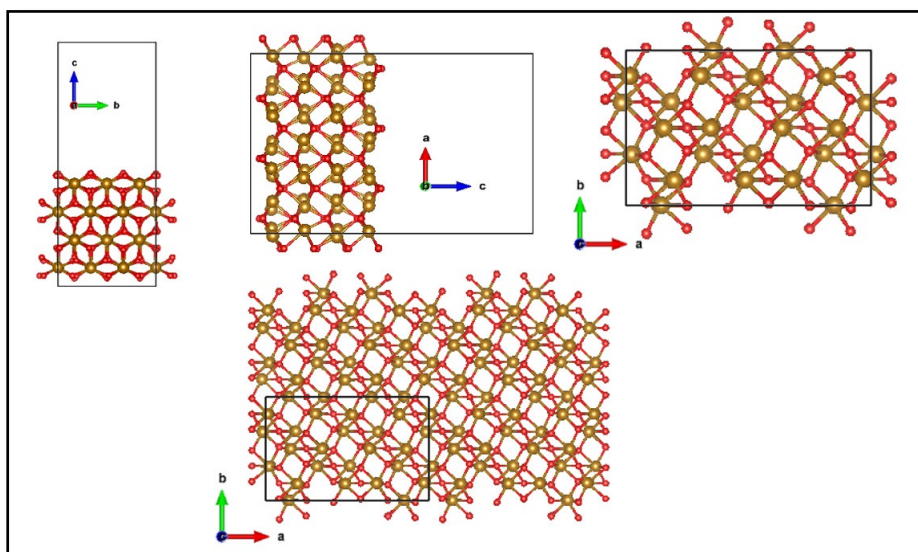

Figure-SI- 5. (top) Different views of the pristine hematite 110 surface (48 Fe, 72 O; hexagonal representation ) used in DFT calculations. (bottom) an extended view with using periodic boundary conditions.

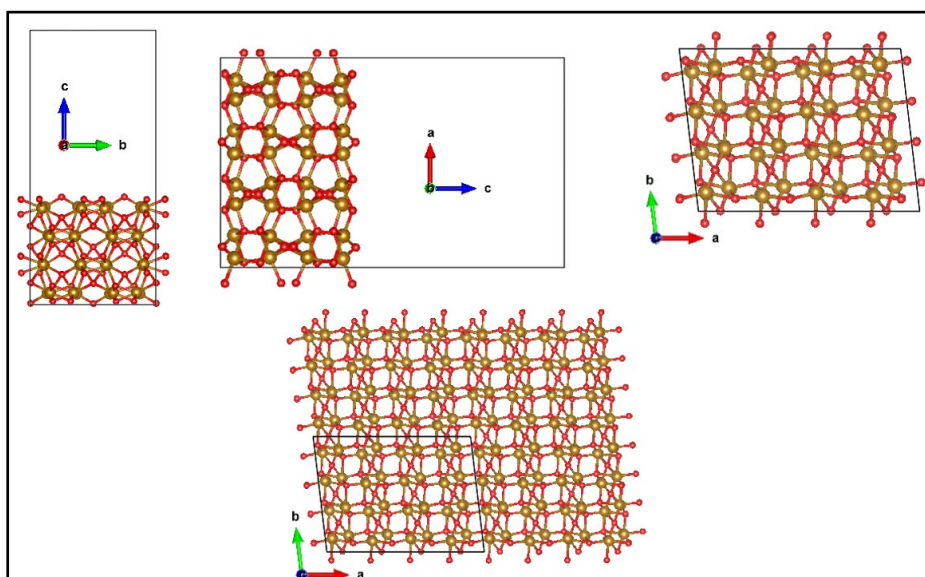

Figure-SI- 6. (top) Different views of the pristine hematite 110 surface (64 Fe, 96 O; rhombohedral representation) used in DFT-MD calculations. (bottom) an extended view with using periodic boundary conditions.
